# Supplementary material for: Solid-phase hot-pressing synthesis of POMOFs on carbon cloth and derived phosphides for all pH value hydrogen evolution
Source: Royal Society of Chemistry journal article supplement (doi:10.1039/c8ta02219d), 2018-01-01
Supplement: c8ta02219d1.pdf [file c8ta02219d1.pdf]

## Supporting Information

### Solid-Phase Hot-Pressing Synthesis of POMOFs on Carbon Cloth and Derived Phosphides for All pH Values Hydrogen Evolution

Yu-Jia Tang,<sup>a‡</sup> Yifa Chen,<sup>a‡</sup> Hong-Jing Zhu,<sup>a</sup> A-Man Zhang,<sup>a</sup> Xiao-Li Wang,<sup>a</sup> Long-Zhang Dong,<sup>a</sup>  
Shun-Li Li,<sup>a</sup> Qiang Xu,<sup>\*b</sup> and Ya-Qian Lan<sup>\*a</sup>

<sup>a</sup>Jiangsu Collaborative Innovation Centre of Biomedical Functional Materials, Jiangsu Key  
Laboratory of New Power Batteries, School of Chemistry and Materials Science, Nanjing  
Normal University, Nanjing 210023, China.

<sup>b</sup>Research Institute of Electrochemical Energy, National Institute of Advanced Industrial  
Science and Technology (AIST), Ikeda, Osaka 563-8577, Japan

#### Corresponding Author

yqlan@njnu.edu.cn; q.xu@aist.go.jp

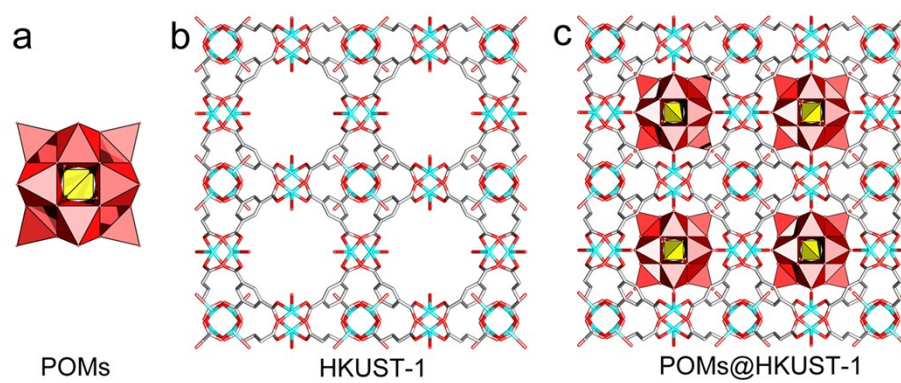

**Figure S1.** The crystal structure of (a) POMs, (b) HKUST-1 and (c) POMs@HKUST-1.

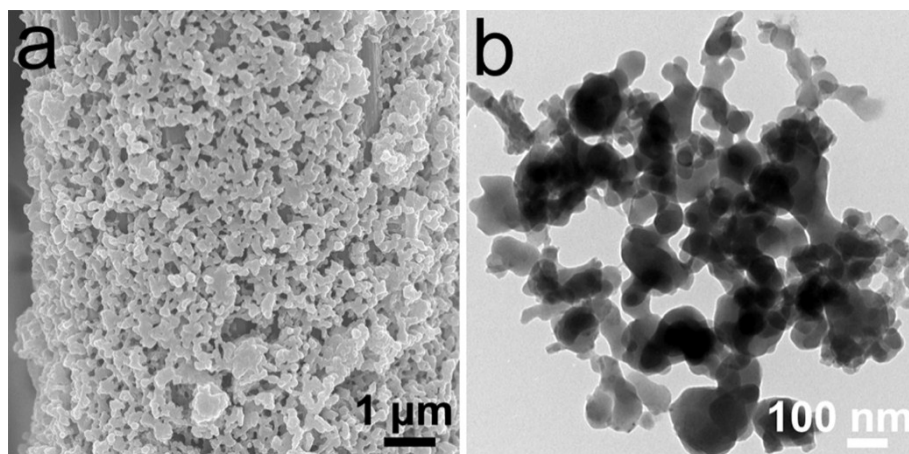

**Figure S2.** (a) SEM image of  $\text{PMo}_{12}@HKUST-1/\text{CC}$ , (b) TEM image of  $\text{PMo}_{12}@HKUST-1$  sonicated from CC.

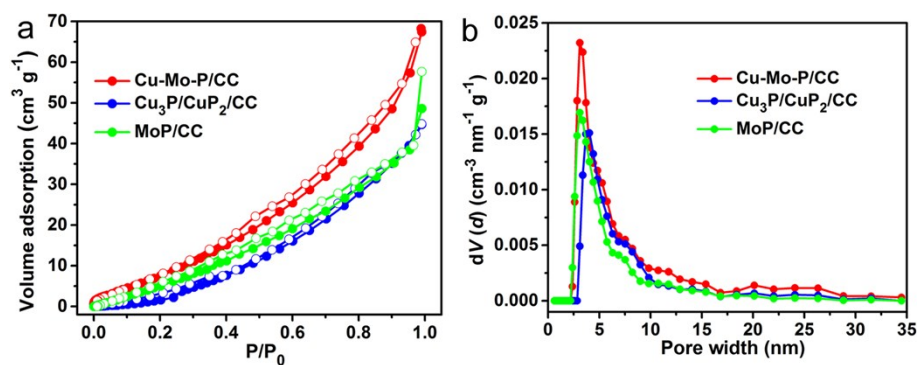

**Figure S3.** (a) Nitrogen adsorption-desorption isotherms of Cu-Mo-P/CC, Cu<sub>3</sub>P/CuP<sub>2</sub>/CC and MoP/CC conducted at 77 K. (b) Pore size distributions of Cu-Mo-P/CC, Cu<sub>3</sub>P/CuP<sub>2</sub>/CC and MoP/CC fitted to the model of nitrogen at 77 K on carbon (slit pore, QSDFT equilibrium model) with the small fitting error(< 7%).

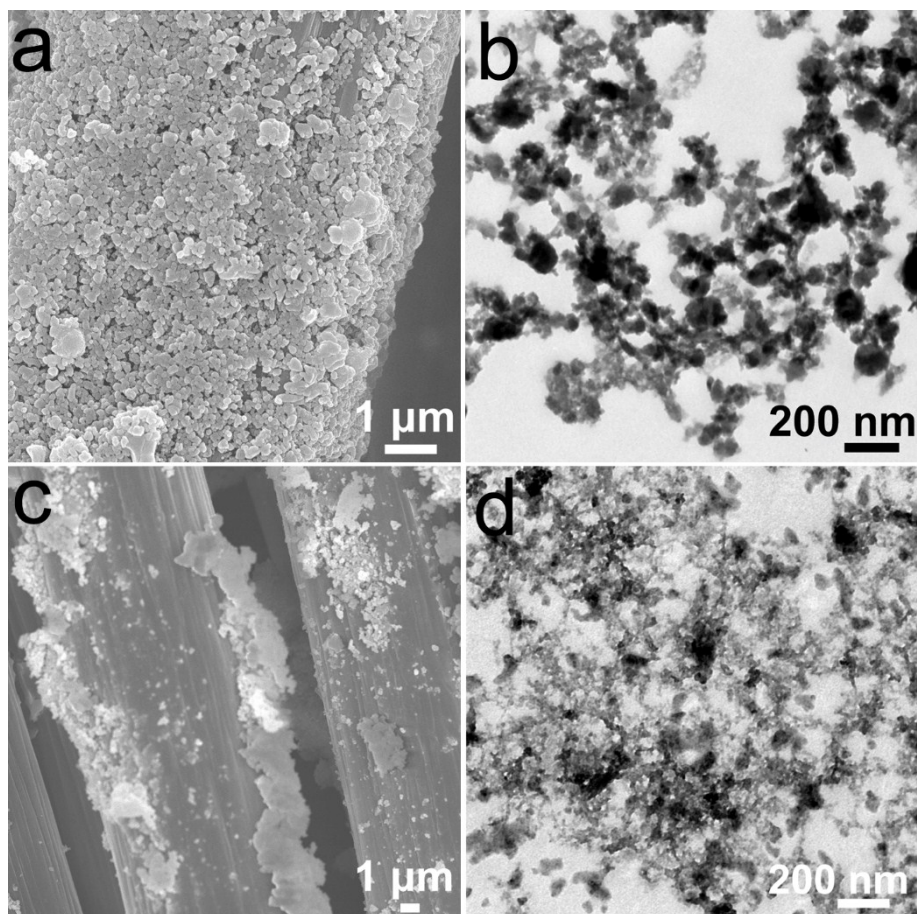

**Figure S4.** (a) SEM image of HKUST-1/CC, (b) TEM image of HKUST-1 sonicated from CC.  
(c) SEM image of PMo<sub>12</sub>/CC, (d) TEM image of PMo<sub>12</sub> sonicated from CC.

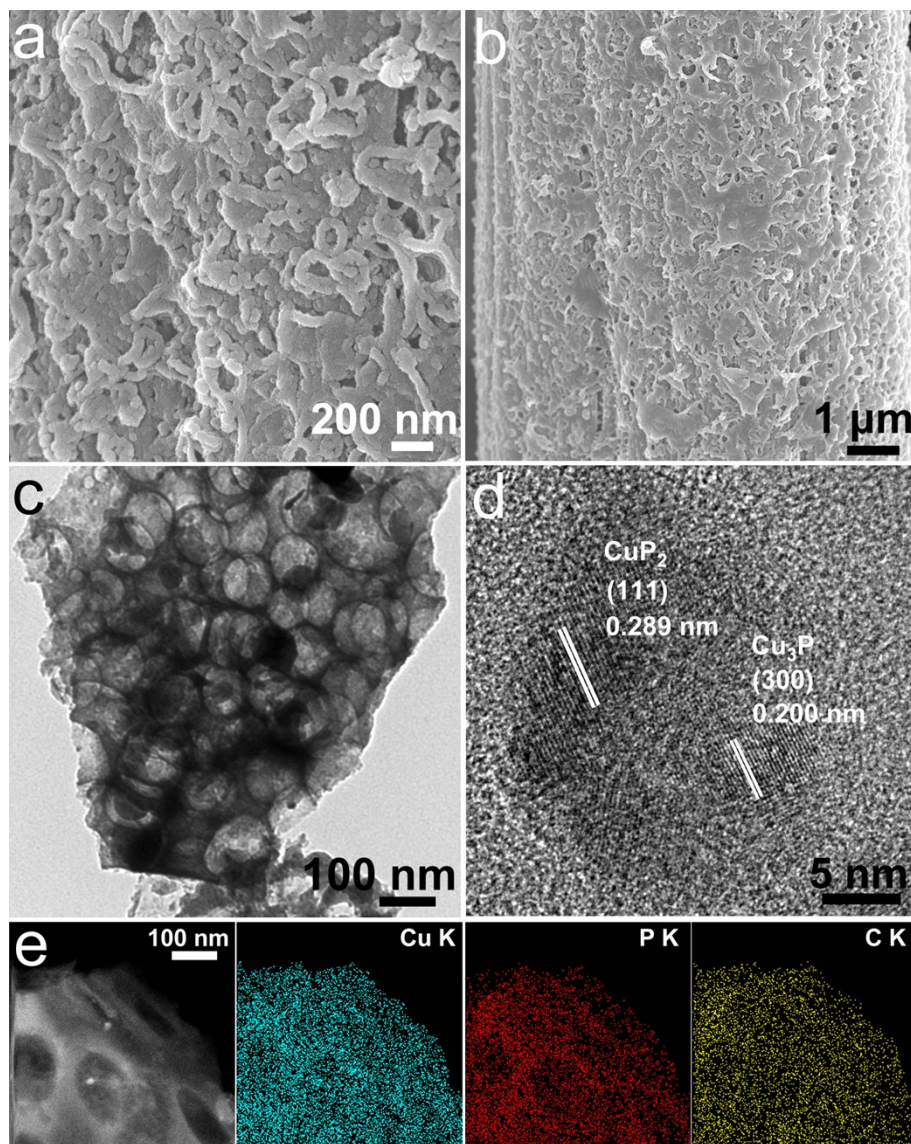

**Figure S5.** (a), (b) SEM images of  $\text{Cu}_3\text{P}/\text{CuP}_2/\text{CC}$ . (c) TEM and (d) HRTEM images of  $\text{Cu}_3\text{P}/\text{CuP}_2$  sonicated from CC. The lattice spacings of 0.200 nm and 0.289 nm are assigned to the (300) plane of  $\text{Cu}_3\text{P}$  and (111) plane of  $\text{CuP}_2$ , respectively. (e) HAADF image and corresponding element mappings, Cu, P and C are shown in blue, red and yellow, respectively.



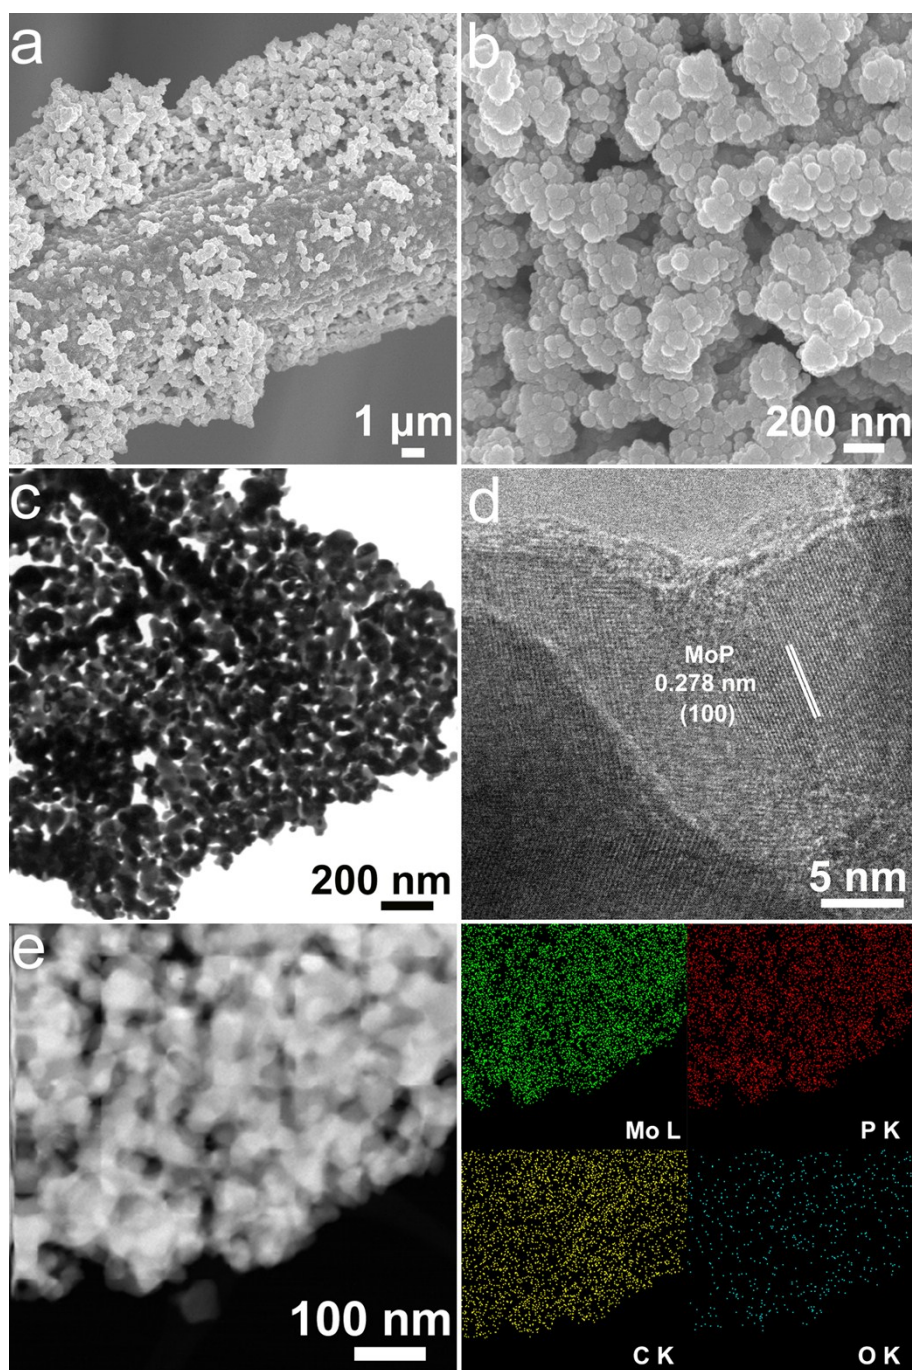

**Figure S6.** (a), (b) SEM images of MoP/CC. (c) TEM and (d) HRTEM image of MoP sonicated form CC. The lattice spacing of 0.278 nm is assigned to the (100) plane of MoP. (e) HAADF image and corresponding element mappings, Mo, P and C are shown in green, red and yellow, respectively.

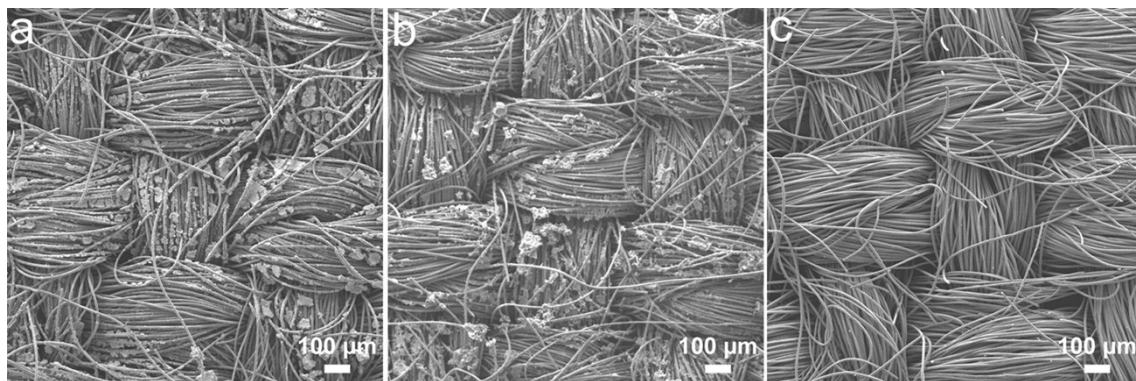

**Figure S7.** SEM images of (a) Cu-Mo-P/CC, (b) Cu<sub>3</sub>P/CuP<sub>2</sub>/CC and (c) MoP/CC in the large scale.

Cu-Mo-P/CC and Cu<sub>3</sub>P/CuP<sub>2</sub>/CC show some agglomerates on the surface of CC in the large scale. After phosphidation, the POMOFs precursors floated on CC can turn into the Cu-Mo-P agglomerates due to the existence of carbon sources mainly derived from the BTC ligands. According to the SEM image in Figure 3b and Figure S5, every carbon fiber for Cu-Mo-P/CC shows the densely and uniformly decorated Cu-Mo-P particles. These agglomerates should be the excess Cu-Mo-P phosphides on CC, which can't coat on every carbon fiber anymore. Therefore, the large area SEM image of Cu-Mo-P/CC proves the advantages of the solid-phase hot-pressing method for the growth of Cu-Mo-P without stacking. In contrast, SEM image of MoP/CC exhibits no agglomerates on CC because of only little carbon source from PEG.



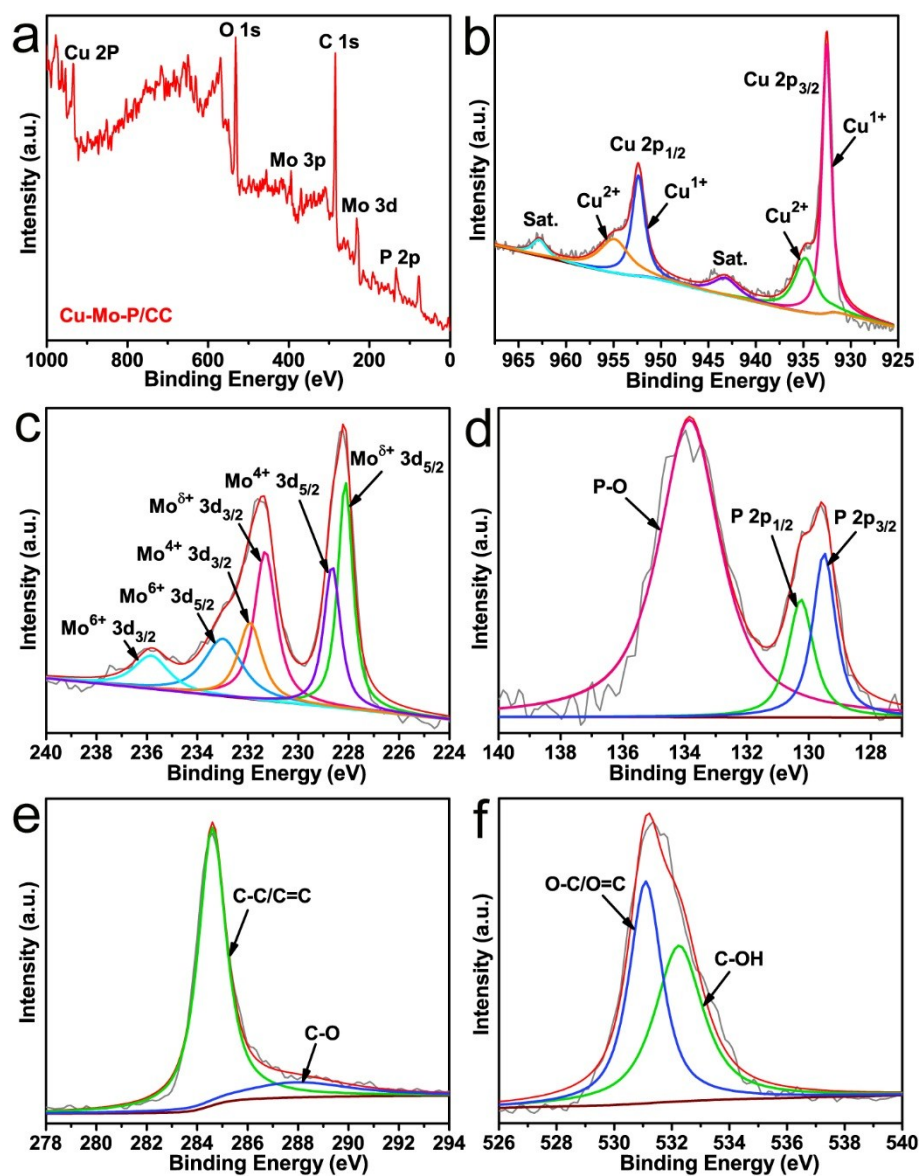

**Figure S8.** XPS spectrum of (a) Cu-Mo-P/CC. High resolution XPS spectra of (b) Cu 2p, (c) Mo 3d, (d) P 2p, (e) C 1s and (f) O 1s.

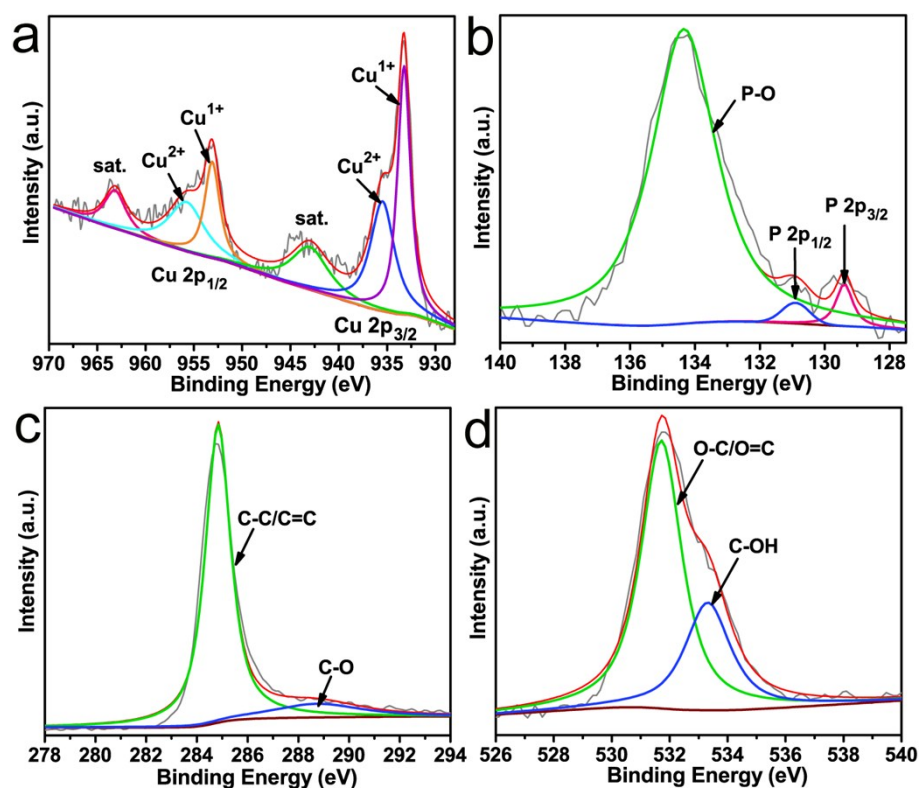

**Figure S9.** High resolution XPS spectra of (a) Cu 2p, (b) P 2p, (c) C 1s and (d) O 1s for  $\text{Cu}_3\text{P}/\text{CuP}_2/\text{CC}$ .

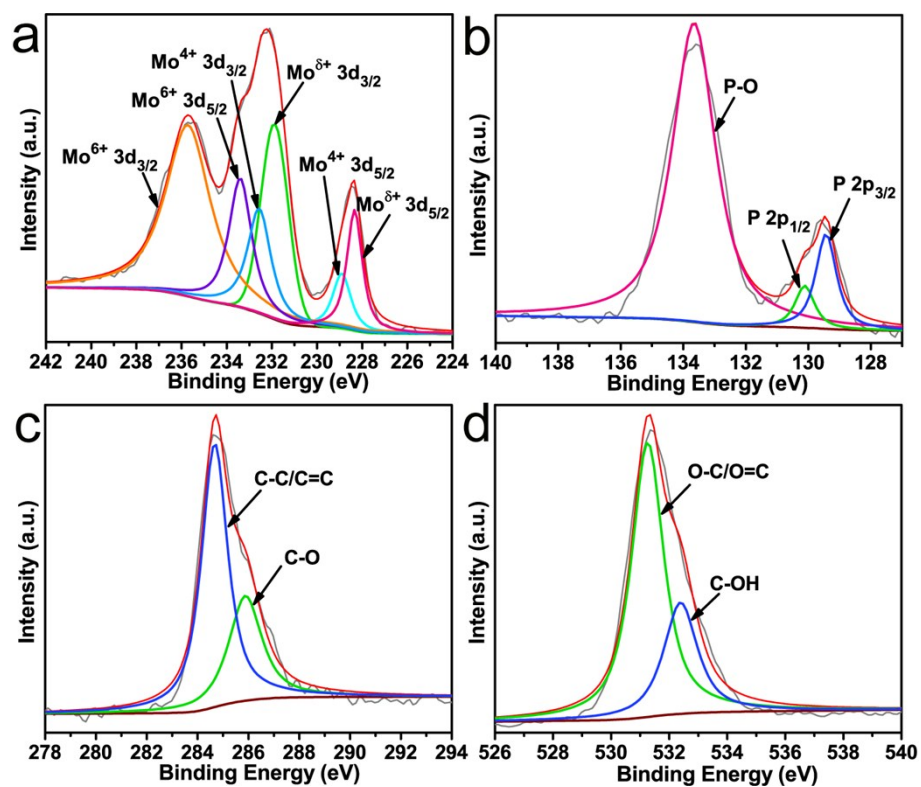

**Figure S10.** High resolution XPS spectra of (a) Mo 3d, (b) P 2p, (c) C 1s and (d) O 1s for MoP/CC.

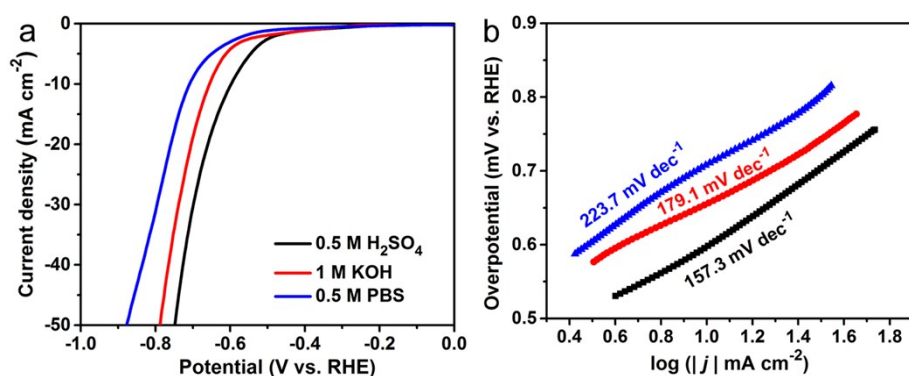

**Figure S11.** (a) LSV curves of bare CC tested at different electrolytes, (b) corresponding Tafel slopes.

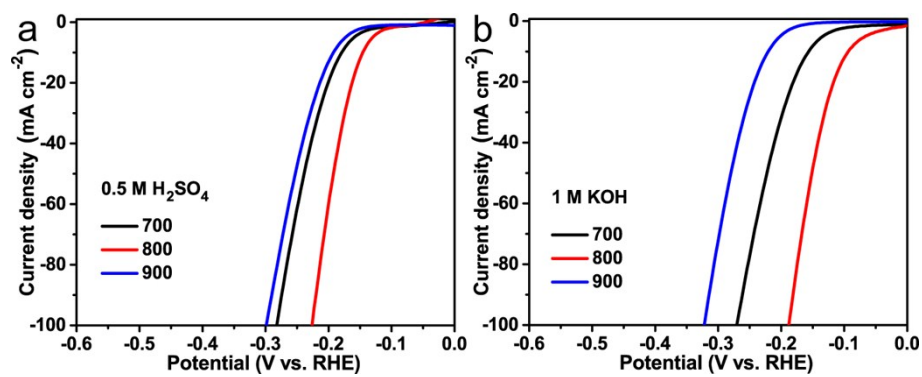

**Figure S12.** LSV curves of Cu-Mo-P/CC synthesized at different phosphidation temperatures (700, 800 and 900 °C) in (a) 0.5 M H<sub>2</sub>SO<sub>4</sub> and (b) 1 M KOH.



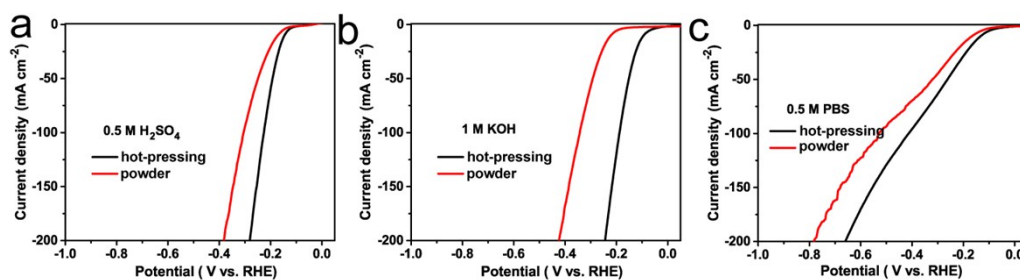

**Figure S13.** LSV curves of Cu-Mo-P/CC prepared using hot-pressing method and Cu-Mo-P powder prepared using solution method in (a) 0.5 M H<sub>2</sub>SO<sub>4</sub>, (b) 1 M KOH and (c) 0.5 M PBS.

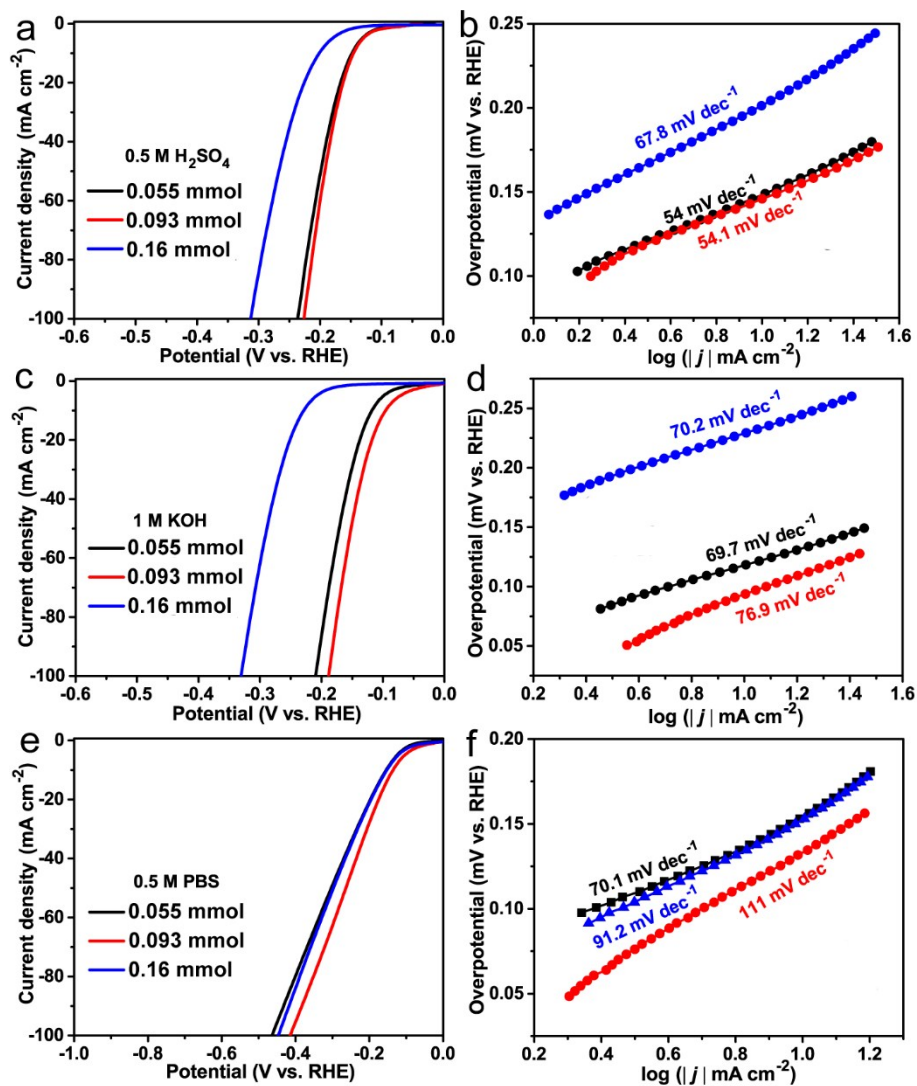

**Figure S14.** LSV curves and Tafel plots of Cu-Mo-P/CC prepared using different  $\text{PMo}_{12}$  loadings in (a) and (b) 0.5 M  $\text{H}_2\text{SO}_4$ , (c) and (d) 1 M KOH, (e) and (f) 0.5 M PBS.

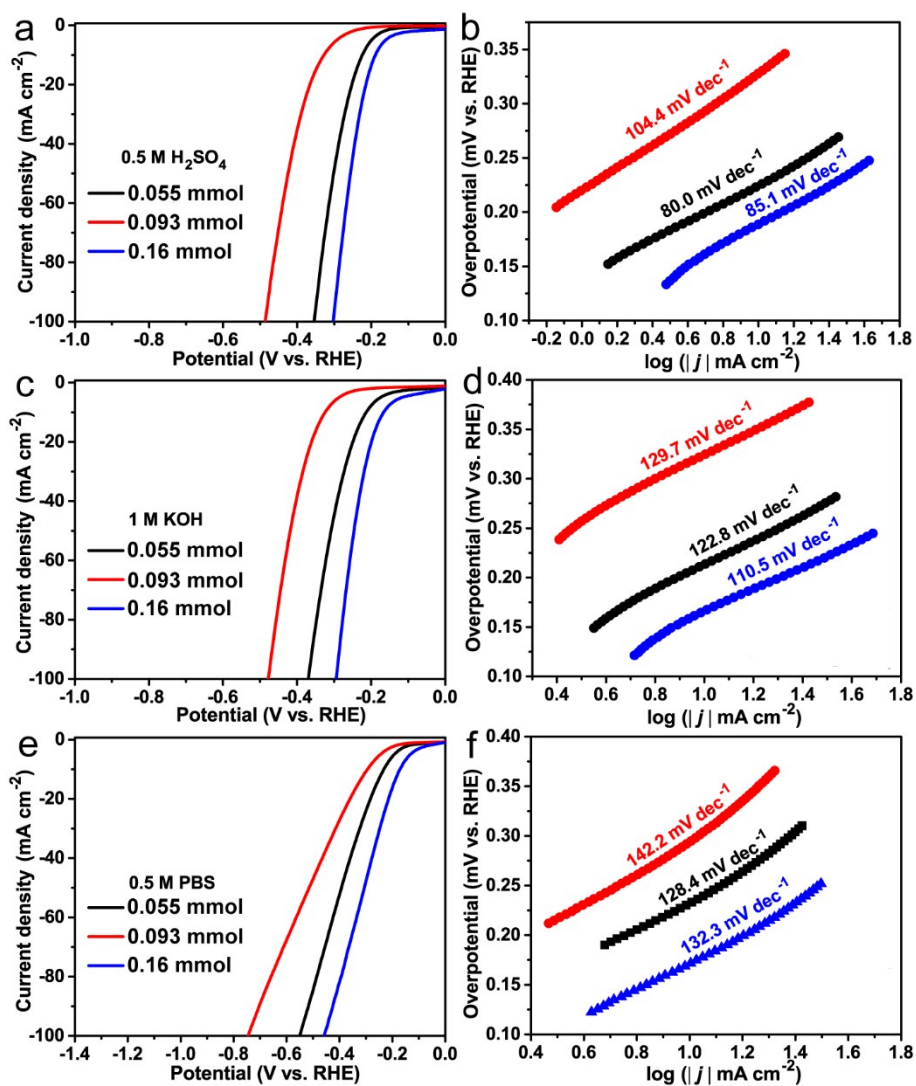

**Figure S15.** LSV curves and Tafel plots of Cu-W-P/CC prepared using different  $PW_{12}$  loadings in (a) and (b) 0.5 M  $H_2SO_4$ , (c) and (d) 1 M KOH, (e) and (f) 0.5 M PBS.

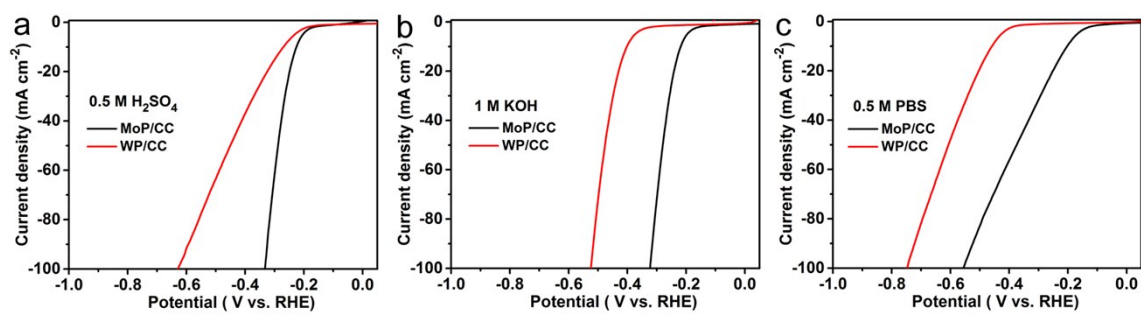

**Figure S16.** LSV curves of MoP/CC and WP/CC prepared using POMs loadings of 0.092 mmol in (a) 0.5 M  $\text{H}_2\text{SO}_4$ , (b) 1 M KOH, (c) 0.5 M PBS.

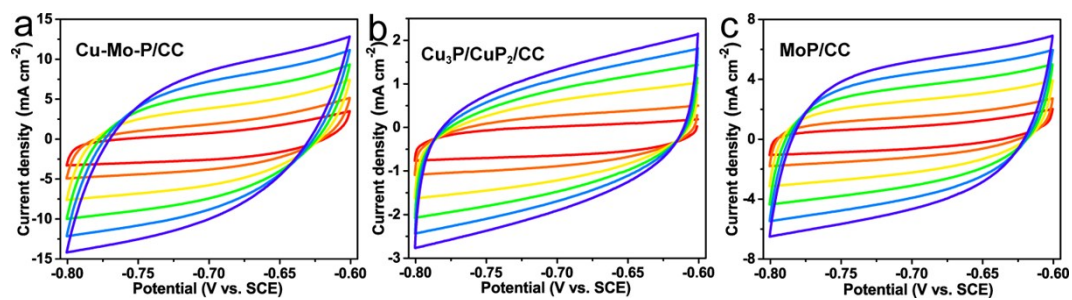

**Figure S17.** CV curves between the potential of -0.8 and -0.6 V vs. SCE at different scan rate (10-100  $\text{mV s}^{-1}$ ) in 1 M KOH for (a) Cu-Mo-P/CC, (b)  $\text{Cu}_3\text{P/CuP}_2$ /CC and (c) MoP/CC.



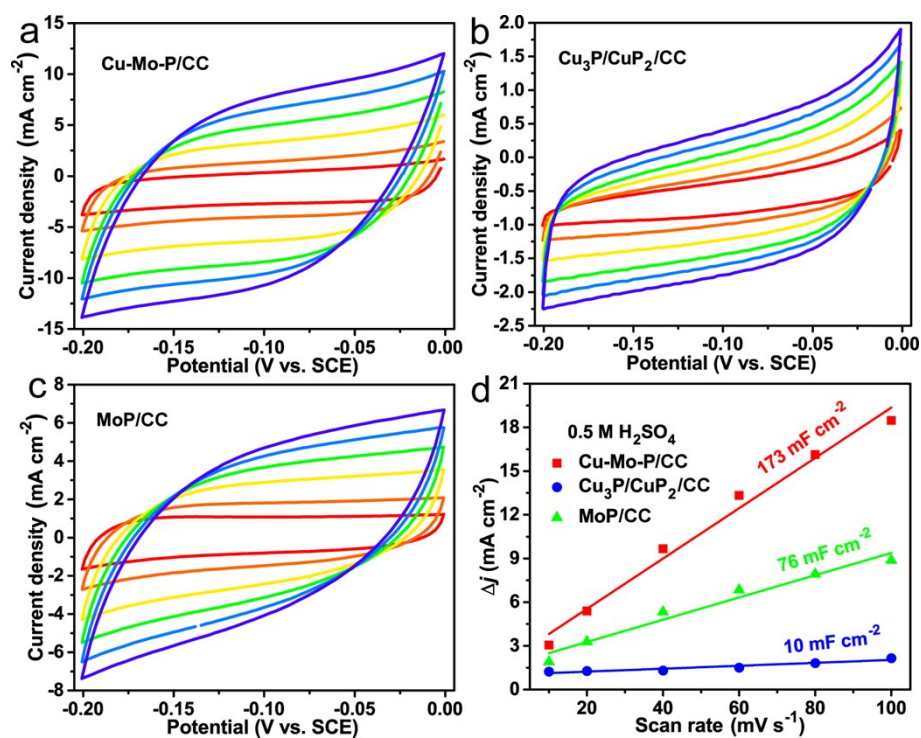

**Figure S18.** CV curves between the potential of -0.2 and 0 V vs. SCE at different scan rate (10-100 mV s<sup>-1</sup>) in 0.5 M H<sub>2</sub>SO<sub>4</sub> for (a) Cu-Mo-P/CC, (b) Cu<sub>3</sub>P/CuP<sub>2</sub>/CC and (c) MoP/CC. (d)  $C_{dl}$  calculated according to the CV curves.

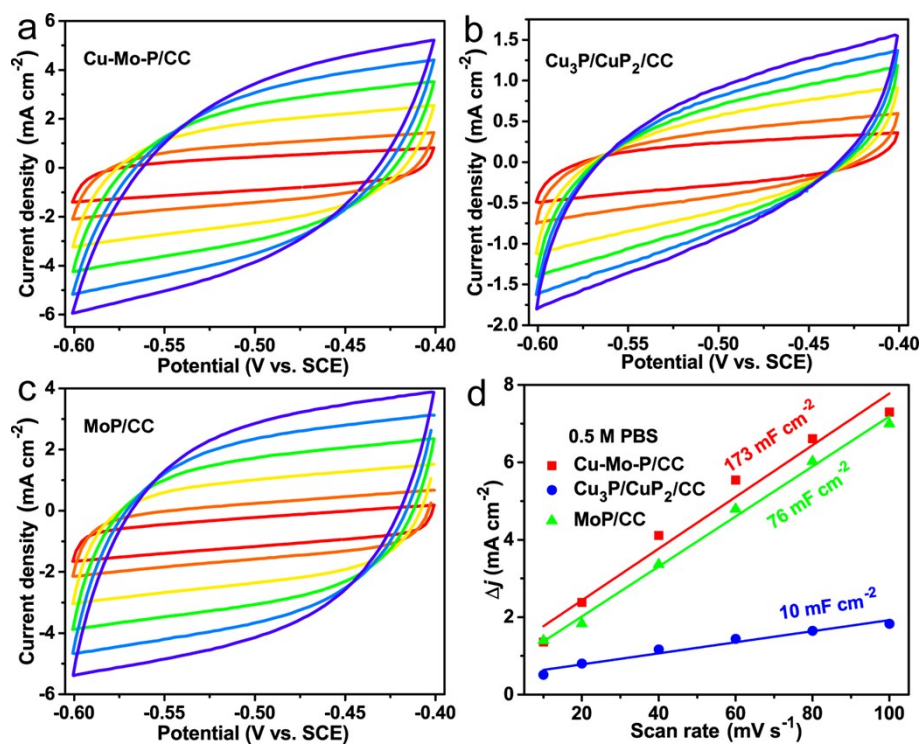

**Figure S19.** CV curves between the potential of -0.6 and -0.4 V vs. SCE at different scan rate (10-100 mV s<sup>-1</sup>) in 0.5 M PBS for (a) Cu-Mo-P/CC, (b) Cu<sub>3</sub>P/CuP<sub>2</sub>/CC and (c) MoP/CC. (d)  $C_{dl}$  calculated according to the CV curves.

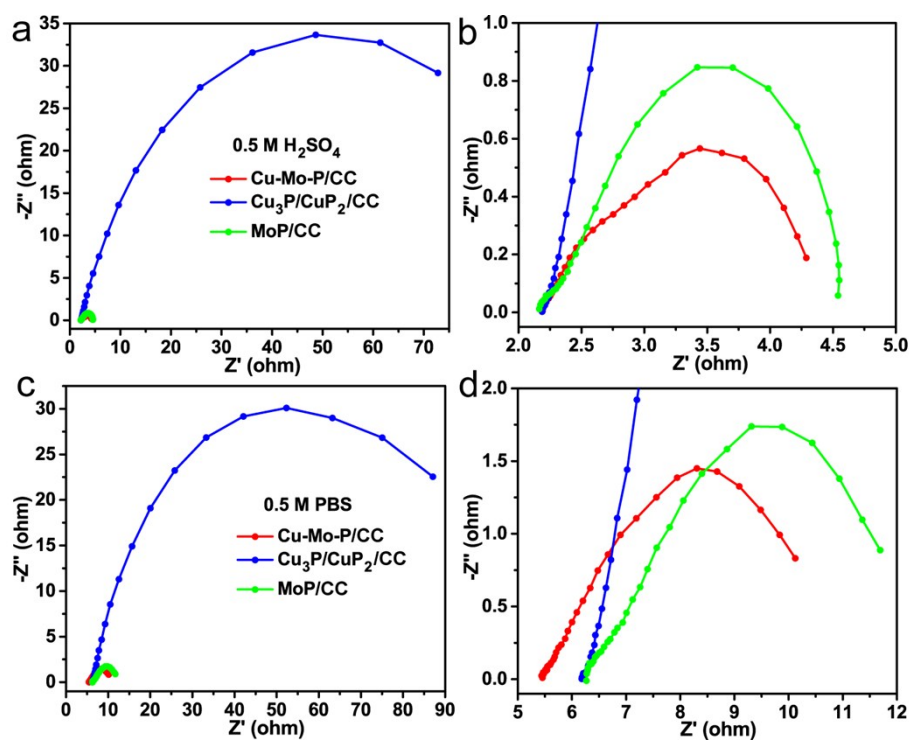

**Figure S20.** EIS spectra of Cu-Mo-P/CC, Cu<sub>3</sub>P/CuP<sub>2</sub>/CC and MoP/CC recorded at the overpotential of 150 mV vs. RHE for HER (a) in 0.5 M H<sub>2</sub>SO<sub>4</sub>, (b) the enlarged spectrum of (a), (c) in 0.5 M PBS, (d) the enlarged spectrum of (c).

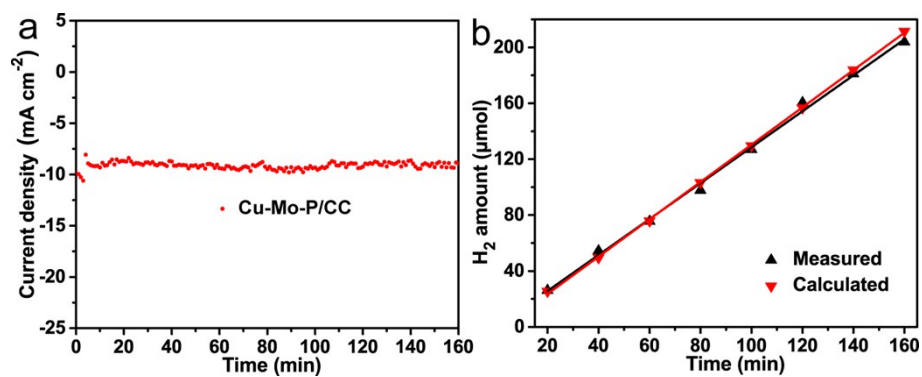

**Figure S21.** (a) Chronoamperometric curve of Cu-Mo-P/CC at fixed potential to reach the current density of 10 mA cm<sup>-2</sup> in 1 M KOH for FE test. (b) The amounts of H<sub>2</sub> measured theoretically and experimentally.

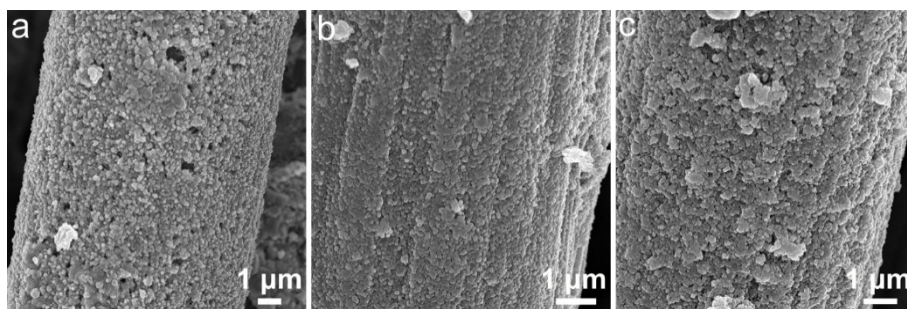

**Figure S22.** SEM images of Cu-Mo-P/CC after CA stability test for 20 h in (a) 0.5 M H<sub>2</sub>SO<sub>4</sub>, (b) 1 M KOH and (c) 0.5 M PBS.



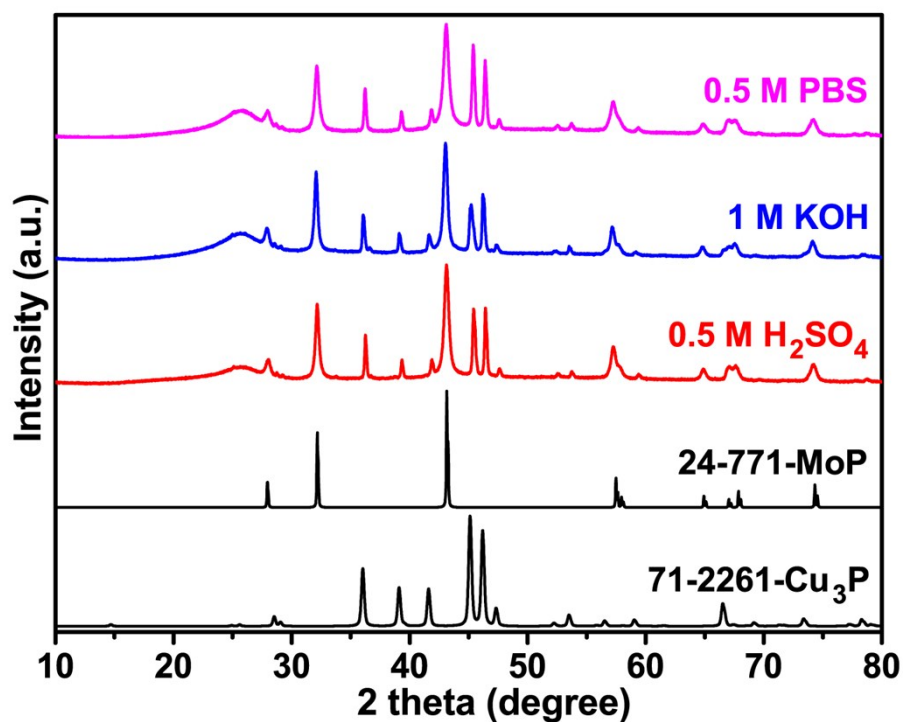

**Figure S23.** PXRD pattern of Cu-Mo-P/CC composite after CA stability test in different electrolytes. PXRD patterns Cu-Mo-P/CC after test in three electrolytes all show the disappearance of CuP<sub>2</sub> but reservation of primary Cu<sub>3</sub>P and MoP, indicating the instability of CuP<sub>2</sub> during the electrocatalytic reaction.

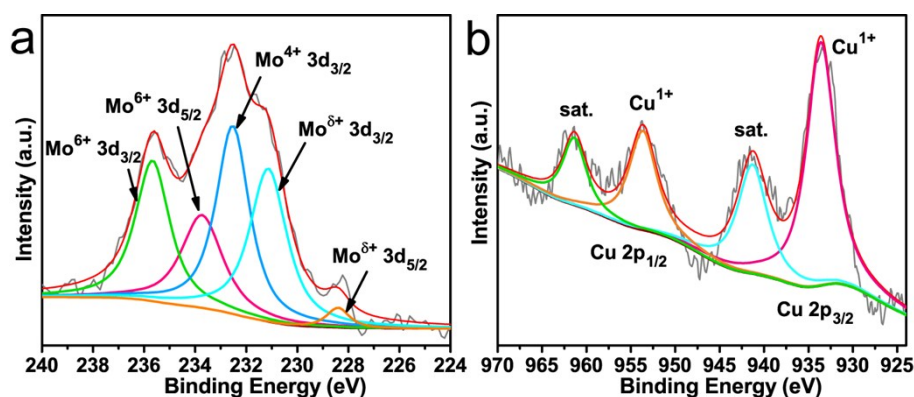

**Figure 24.** XPS spectra of Cu-Mo-P/CC composite after CA stability test in 0.5 M H<sub>2</sub>SO<sub>4</sub> for (a) Mo 3d spectrum and (b) Cu 2p spectrum. Mo 3d spectrum of Cu-Mo-P after CA test in acid solution can be deconvoluted into five peaks assigning to MoP and molybdenum oxides. However, Cu<sup>2+</sup> peaks are disappeared in Cu 2p spectrum, indicating the conversion of CuP<sub>2</sub> into Cu<sub>3</sub>P.

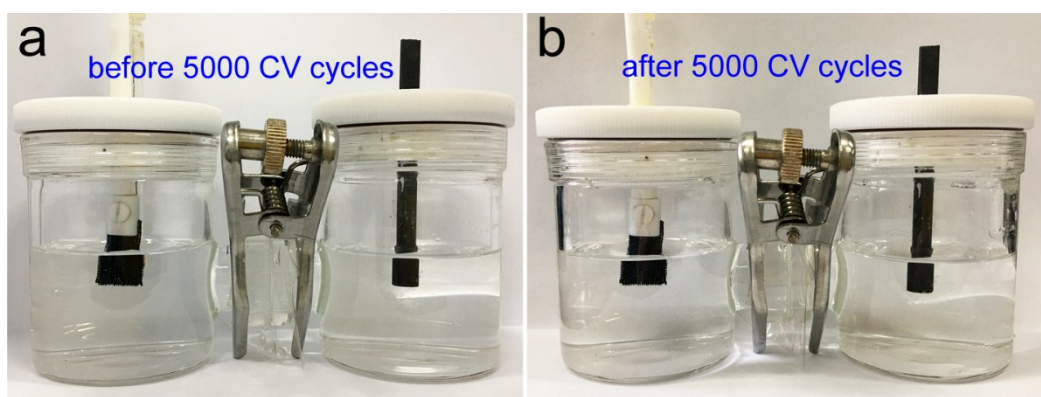

**Figure S25.** Photographs of Cu-Mo-P/CC in 0.5 M H<sub>2</sub>SO<sub>4</sub> (a) before and (b) after 5000 CV cycles test.

**Table S1.** The total mass of bare CC and Cu-Mo-P/CC and the average mass loading of Cu-Mo-P catalyst (the area of CC is  $1 \times 2 \text{ cm}^2$ ).

|                                              | 1    | 2    | 3    | 4    |
|----------------------------------------------|------|------|------|------|
| Bare CC (mg)                                 | 2.61 | 2.63 | 2.53 | 2.60 |
| Cu-Mo-P/CC (mg)                              | 5.29 | 5.45 | 5.19 | 5.40 |
| Cu-Mo-P catalyst (mg)                        | 2.68 | 2.82 | 2.66 | 2.80 |
| Average mass loading ( $\text{mg cm}^{-2}$ ) | 1.37 |      |      |      |

**Table S2.** Atomic percent (%) of corresponding samples by XPS analysis.

|                                             | Cu 2p | Mo 3d | P 2p  | C 1s  | O 1s  |
|---------------------------------------------|-------|-------|-------|-------|-------|
| Cu-Mo-P/CC                                  | 2.24  | 2.86  | 8.01  | 66.85 | 20.04 |
| $\text{Cu}_3\text{P}/\text{CuP}_2/\text{C}$ | 2.07  | /     | 4.95  | 79.65 | 13.33 |
| MoP/CC                                      | /     | 10.45 | 11.88 | 31.95 | 45.72 |

**Table S3.** Comparison of  $\eta_{10}$  and Tafel Slope of corresponding samples in the manuscript for all pH values HER performance.

| Samples                                    | HER parameter                       | 0.5 M H <sub>2</sub> SO <sub>4</sub> | 1 M KOH     | 0.5 M PBS |
|--------------------------------------------|-------------------------------------|--------------------------------------|-------------|-----------|
| Cu-Mo-P/CC                                 | $\eta_{10}$ (mV vs. RHE)            | 145.9                                | <b>90.5</b> | 132.6     |
|                                            | Tafel slope (mV dec <sup>-1</sup> ) | <b>54.1</b>                          | 76.9        | 111       |
| Cu <sub>3</sub> P/CuP <sub>2</sub> /CC     | $\eta_{10}$ (mV vs. RHE)            | 266.1                                | 358.7       | 294.8     |
|                                            | Tafel slope (mV dec <sup>-1</sup> ) | 86.9                                 | 162.1       | 105       |
| MoP/CC                                     | $\eta_{10}$ (mV vs. RHE)            | 223.6                                | 220.2       | 202.2     |
|                                            | Tafel slope (mV dec <sup>-1</sup> ) | 74.2                                 | 72.2        | 109       |
| Cu-W-P/CC<br>(0.16 mmol PW <sub>12</sub> ) | $\eta_{10}$ (mV vs. RHE)            | 187.4                                | 163.9       | 172.0     |
|                                            | Tafel slope (mV dec <sup>-1</sup> ) | 85.1                                 | 110.5       | 132.3     |



**Table S4.** Comparison of HER performance of Cu-Mo-P/CC and recently reported MOFs-derived materials and other phosphides on conductive substrates as HER electrocatalysts at different electrolytes.

| Electrocatalyst            | Substrate              | Electrolyte                          | $\eta_{10}$ (mV vs. RHE) | Tafel slope (mV dec <sup>-1</sup> ) | Reference |
|----------------------------|------------------------|--------------------------------------|--------------------------|-------------------------------------|-----------|
| Cu-Mo-P/CC                 | Carbon cloth           | 0.5 M H <sub>2</sub> SO <sub>4</sub> | 145.4                    | <b>54.1</b>                         | This work |
|                            |                        | 1 M KOH                              | <b>90.5</b>              | 76.9                                |           |
|                            |                        | 0.5 M PBS                            | 132.6                    | 111                                 |           |
| Ni-Fe-P@C                  | Ni foam                | 1 M KOH                              | 79                       | 92.6                                | [1]       |
| Co-Ni-Se/C/NF              | Ni foam                | 1 M KOH                              | 90                       | 81                                  | [2]       |
| CoSe <sub>2</sub> /CF      | Carbon fiber paper     | 1 M KOH                              | 95                       | 52                                  | [3]       |
| ZIF@LDH@Ni foam-600        | Ni foam                | 1 M KOH                              | 106                      | 109                                 | [4]       |
| Ni@CoO@CoNC                | Ni foam                | 1 M KOH                              | 190                      | 98                                  | [5]       |
| CoS <sub>2</sub> NTA/CC    | Carbon cloth           | 1 M KOH                              | 193                      | 88                                  | [6]       |
| Co@NC                      | Ni foam                | 0.1 M KOH                            | 240                      | 126.8                               | [7]       |
| Cu <sub>3</sub> P NW/CF    | Copper foam            | 0.5 M H <sub>2</sub> SO <sub>4</sub> | 143                      | 67                                  | [8]       |
| WP NAs/CC                  | Carbon cloth           | 0.5 M H <sub>2</sub> SO <sub>4</sub> | 130                      | 69                                  | [9]       |
|                            |                        | 1 M KOH                              | 150                      | 102                                 |           |
|                            |                        | 1 M PBS                              | 200                      | 125                                 |           |
| CoP/CC                     | Carbon cloth           | 0.5 M H <sub>2</sub> SO <sub>4</sub> | 67                       | 51                                  | [10]      |
|                            |                        | 1 M KOH                              | 209                      | 129                                 |           |
|                            |                        | 1 M PBS                              | 106                      | 93                                  |           |
| CuCo@NC                    | Glass carbon electrode | 0.5 M H <sub>2</sub> SO <sub>4</sub> | 145                      | 79                                  | [11]      |
| NiCoP@Cu <sub>3</sub> P/CF | Cu foam                | 1 M KOH                              | 54                       | 72                                  | [12]      |
| Cu@NC NT/CF-500            | Cu foam                | 1 M KOH                              | 123                      | 63                                  | [13]      |
| Cu <sub>3</sub> P NB       | Cu mesh                | 0.5 M H <sub>2</sub> SO <sub>4</sub> | 120                      | 72                                  | [14]      |
|                            |                        | 1 M KOH                              | 252                      | 150                                 |           |

**Table S5.**  $R_{ct}$  values ( $\Omega$ ) recorded at the overpotential of 150 mV vs. RHE in different electrolytes.

|                                        | 0.5 M H <sub>2</sub> SO <sub>4</sub> | 1 M KOH     | 0.5 M PBS |
|----------------------------------------|--------------------------------------|-------------|-----------|
| Cu-Mo-P/CC                             | 1.6                                  | <b>0.96</b> | 4         |
| Cu <sub>3</sub> P/CuP <sub>2</sub> /CC | 82.2                                 | 48.8        | 83.6      |
| MoP/CC                                 | 1.8                                  | 1.3         | 5.8       |

## Reference

1. S. H. Ahn and A. Manthiram, *J. Mater. Chem. A*, 2017, **5**, 2496-2503.
2. F. Ming, H. Liang, H. Shi, X. Xu, G. Mei and Z. Wang, *J. Mater. Chem. A*, 2016, **4**, 15148-15155.
3. C. Sun, Q. Dong, J. Yang, Z. Dai, J. Lin, P. Chen, W. Huang and X. Dong, *Nano Res.*, 2016, **9**, 2234-2243.
4. Y. Tang, X. Fang, X. Zhang, G. Fernandes, Y. Yan, D. Yan, X. Xiang and J. He, *ACS Appl. Mater. Interfaces*, 2017, **9**, 36762-36771.
5. G. Cai, W. Zhang, L. Jiao, S.-H. Yu and H.-L. Jiang, *Chem*, **2**, 791-802.
6. C. Guan, X. Liu, A. M. Elshahawy, H. Zhang, H. Wu, S. J. Pennycook and J. Wang, *Nanoscale Horiz.*, 2017, **2**, 342-348.
7. A. Aijaz, J. Masa, C. Rösler, W. Xia, P. Weide, R. A. Fischer, W. Schuhmann and M. Muhler, *ChemElectroChem*, 2017, **4**, 188-193.
8. J. Tian, Q. Liu, N. Cheng, A. M. Asiri and X. Sun, *Angew. Chem. Int. Ed.*, 2014, **53**, 9577-9581.
9. Z. Pu, Q. Liu, A. M. Asiri and X. Sun, *ACS Appl. Mater. Interfaces*, 2014, **6**, 21874-21879.
10. J. Tian, Q. Liu, A. M. Asiri and X. Sun, *J. Am. Chem. Soc.*, 2014, **136**, 7587-7590.
11. M. Kuang, Q. Wang, P. Han and G. Zheng, *Adv. Energy Mater.*, 2017, **7**, 1700193.
12. X. Ma, Y. Chang, Z. Zhang and J. Tang, *J. Mater. Chem. A*, 2018, **6**, 2100-2106.
13. Y. Zhang, Y. Ma, Y.-Y. Chen, L. Zhao, L.-B. Huang, H. Luo, W.-J. Jiang, X. Zhang, S. Niu, D. Gao, J. Bi, G. Fan and J.-S. Hu, *ACS Appl. Mater. Interfaces*, 2017, **9**, 36857-36864.
14. S. Wei, K. Qi, Z. Jin, J. Cao, W. Zheng, H. Chen and X. Cui, *ACS Omega*, 2016, **1**, 1367-1373.
